# Supplementary material for: Nocturnal Hypoxemia and High Circulating TNF-α Levels in Chronic Thromboembolic Pulmonary Hypertension
Source: PubMed Central journal article supplement — Intern Med. 2020 Aug 1;59(15):1819–26. doi: 10.2169/internalmedicine.4458-20 (PMC7475001; doi:10.2169/internalmedicine.4458-20), 2020-08-01
Supplement: 1349-7235-59-1819-s002.pdf [file 1349-7235-59-1819-s002.pdf]

**Supplemental Table 1.** Spearman rank correlation coefficient between the representative parameter from WatchPAT and the pulmonary hemodynamic parameters in CTEPH patients

| <b>Factors</b>                                             | <b>ρ value</b>    | <b>p value</b>           |
|------------------------------------------------------------|-------------------|--------------------------|
| <b>Nocturnal Mean SpO<sub>2</sub></b>                      |                   |                          |
| Mean pulmonary artery pressure (mmHg)                      | <b>-0.477</b>     | <b>0.001<sup>‡</sup></b> |
| Pulmonary vascular resistance (dyne·sec·cm <sup>-5</sup> ) | <b>-0.456</b>     | <b>0.002<sup>‡</sup></b> |
| Cardiac index (L/min/m <sup>2</sup> )                      | <b>0.306</b>      | <b>0.051</b>             |
| <b>Nocturnal Minimum SpO<sub>2</sub></b>                   |                   |                          |
| Mean pulmonary artery pressure (mmHg)                      | <b>-0.186</b>     | <b>0.244</b>             |
| Pulmonary vascular resistance (dyne·sec·cm <sup>-5</sup> ) | <b>-0.135</b>     | <b>0.397</b>             |
| Cardiac index (L/min/m <sup>2</sup> )                      | <b>0.146</b>      | <b>0.361</b>             |
| <b>Oxygen Desaturation Index</b>                           |                   |                          |
| Mean pulmonary artery pressure (mmHg)                      | <b>&lt; 0.001</b> | <b>0.995</b>             |
| Pulmonary vascular resistance (dyne·sec·cm <sup>-5</sup> ) | <b>-0.035</b>     | <b>0.827</b>             |
| Cardiac index (L/min/m <sup>2</sup> )                      | <b>0.016</b>      | <b>0.920</b>             |
| <b>WP-AHI</b>                                              |                   |                          |
| Mean pulmonary artery pressure (mmHg)                      | <b>0.071</b>      | <b>0.897</b>             |
| Pulmonary vascular resistance (dyne·sec·cm <sup>-5</sup> ) | <b>0.030</b>      | <b>0.849</b>             |
| Cardiac index (L/min/m <sup>2</sup> )                      | <b>-0.108</b>     | <b>0.499</b>             |

WP-AHI, apnea-hypopnea index calculated by WatchPAT. ‡, p < 0.01
