# Supplementary material for: Nocturnal Hypoxemia and High Circulating TNF-α Levels in Chronic Thromboembolic Pulmonary Hypertension
Source: PubMed Central journal article supplement — Intern Med. 2020 Aug 1;59(15):1819–26. doi: 10.2169/internalmedicine.4458-20 (PMC7475001; doi:10.2169/internalmedicine.4458-20), 2020-08-01
Supplement: 1349-7235-59-1819-s003.pdf [file 1349-7235-59-1819-s003.pdf]

**Supplemental Table 2.** The characteristics of the remitting PTE patients

|                                      | <b>remitting PTE patients<br/>n=12</b> |
|--------------------------------------|----------------------------------------|
| Age (years)                          | 75 (56 - 77.7)                         |
| Sex (M: F)                           | 1:11                                   |
| Body Height (cm)                     | 154.8 ± 7.9                            |
| Body Weight (kg)                     | 57.7 ± 11.9                            |
| Body mass index (kg/m <sup>2</sup> ) | 24.1 ± 5.0                             |
| time from the onset of PTE (month)   | 57.1 ± 29.6                            |
| Systolic blood pressure (mmHg)       | 122.5 ± 14.3                           |
| Diastolic blood pressure (mmHg)      | 69.5 (64 - 73.2)                       |
| SpO <sub>2</sub> (%)                 | 98 (97 - 98)                           |
| BNP (pg/ml)                          | 16.9 (12.2 - 33.6)                     |

SpO<sub>2</sub>, percutaneous arterial oxygen saturation; BNP, brain natriuretic peptide.

No patient received oxygen supplementation therapy.
