# Supplementary material for: Nocturnal Hypoxemia and High Circulating TNF-α Levels in Chronic Thromboembolic Pulmonary Hypertension
Source: PubMed Central journal article supplement — Intern Med. 2020 Aug 1;59(15):1819–26. doi: 10.2169/internalmedicine.4458-20 (PMC7475001; doi:10.2169/internalmedicine.4458-20), 2020-08-01
Supplement: 1349-7235-59-1819-s005.pdf [file 1349-7235-59-1819-s005.pdf]

**Supplemental Table 3.** The data of the four patients who underwent polysomnography

|                      | Mean duration<br>(second) |           |           |           | Total count |           |           |           | Index<br>(count/hour) |           |           |           |
|----------------------|---------------------------|-----------|-----------|-----------|-------------|-----------|-----------|-----------|-----------------------|-----------|-----------|-----------|
|                      | Case<br>1                 | Case<br>2 | Case<br>3 | Case<br>4 | Case<br>1   | Case<br>2 | Case<br>3 | Case<br>4 | Case<br>1             | Case<br>2 | Case<br>3 | Case<br>4 |
| Obstructive<br>apnea | 21.4                      | 21.1      | 18.4      | 23.4      | 7           | 18        | 30        | 27        | 0.8                   | 3.0       | 6.3       | 5.0       |
| Central<br>apnea     | 20.0                      | 0.0       | 0.0       | 22.7      | 4           | 0.0       | 0.0       | 4         | 0.5                   | 0.0       | 0.0       | 0.7       |
| Mixed apnea          | 0.0                       | 0.0       | 0.0       | 21.9      | 0.0         | 0.0       | 0.0       | 1         | 0.0                   | 0.0       | 0.0       | 0.2       |
| Hypopnea             | 41.0                      | 33.6      | 24.3      | 27.7      | 88          | 22        | 86        | 213       | 9.9                   | 3.7       | 18.0      | 39.3      |
